# Supplementary material for: Contributions of Zea mays subspecies mexicana haplotypes to modern maize
Source: PubMed Central journal article supplement (PMC5707364; doi:10.1038/s41467-017-02063-5), 2017-11-30
Supplement: 41467_2017_2063_MOESM3_ESM.pdf [file 41467_2017_2063_MOESM3_ESM.pdf]

## **Description of Supplementary Files**

File Name: Supplementary Data 1

Description: The position and origin information of *mexicana* bins used for the meta-assembling.

File Name: Supplementary Data 2

Description: The position and origin information of Mo17 bins used for the meta-assembling.

File Name: Supplementary Data 3

Description: The rate of putative introgression regions between maize and *mexicana* for the individuals of maize hapmap3.

File Name: Supplementary Data 4

Description: The overlap between putative introgression regions and detected QTLs in TM population.
